# Supplementary figures and images for: All or Nothing: Protein Complexes Flip Essentiality between Distantly Related Eukaryotes
Source: PubMed Central journal article supplement — Genome Biol Evol. 2013 May 8;5(6):1049–59. doi: 10.1093/gbe/evt074 (PMC3698920; doi:10.1093/gbe/evt074), 2013-05-08

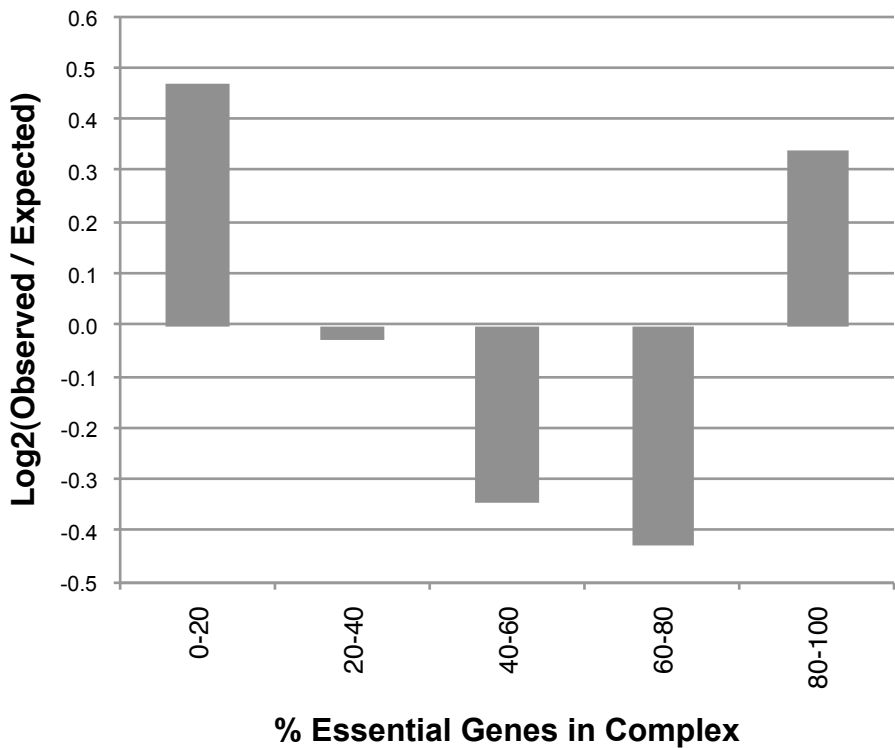

Supplement: supp_evt074_Figure_S1.pdf [file supp_evt074_Figure_S1.pdf]
